# Supplementary material for: The factors influencing inappropriate child feeding practices among families receiving nutrition allowance in the Himalayan region of Nepal
Source: PubMed Central journal article supplement (PMC9940375; doi:10.1186/s40795-023-00691-3), 2023-02-20
Supplement: 40795_2023_691_MOESM2_ESM.pdf [file 40795_2023_691_MOESM2_ESM.pdf]

# The factors influencing inappropriate child feeding practices among families receiving nutrition allowance in the Himalayan region of Nepal

## Section 1 A: Socio demographic Characteristics

| S.N | Question                                                   | Response                                                                                                                                                                      |
|-----|------------------------------------------------------------|-------------------------------------------------------------------------------------------------------------------------------------------------------------------------------|
| 1   | Sex                                                        | a) Male<br>b) Female                                                                                                                                                          |
| 2   | How old are you?                                           |                                                                                                                                                                               |
| 3   | What is the highest level of education you have completed? | a) No formal schooling<br>b) Less than primary school<br>c) Primary school completed<br>Secondary school completed<br>d) Higher secondary (10+2)<br>e) Above higher secondary |
| 4   | What is your ethnic background?                            | f) Brahmin<br>g) Kshetri / Thakuri<br>h) Janjati<br>i) Dalit<br>j) Others                                                                                                     |
| 5   | What is your occupation?                                   | k) Government employee<br>l) Non-government employee<br>m) Self-employed<br>n) Student<br>o) Homemaker<br>p) Unemployed (unable to work)                                      |
| 6   | What is your Husband Occupation?                           |                                                                                                                                                                               |
| 7   | How many members are there in your house?                  |                                                                                                                                                                               |
| 8   | What is your religion?                                     | a) Hindu<br>b) Buddhist<br>c) Ishlam<br>d) Christianity<br>e) Others                                                                                                          |
| 9   | What is your income source?                                | f) Business<br>g) Teaching<br>h) Agriculture<br>i) Others .....                                                                                                               |

|    |                                                                      |                                                                                                              |
|----|----------------------------------------------------------------------|--------------------------------------------------------------------------------------------------------------|
| 10 | How much income in your family per month (in Rs.)                    |                                                                                                              |
| 11 | What was your Age at marriage?                                       |                                                                                                              |
| 12 | What was your Age at first pregnancy?                                |                                                                                                              |
| 13 | Where did you delivery your baby?                                    | a) Health facilities<br>b) Home                                                                              |
| 14 | How many times did you attend ANC when you were pregnant?            |                                                                                                              |
| 15 | How many times did you attend PNC after delivery of child?           |                                                                                                              |
| 16 | What was your last child's birth weight?                             | a) less than 1.5 kg VLBW<br>b) 1.5- 2.5kg LBW<br>c) 2.5- 4 kg Normal<br>d) more than 4 kg Large birth weight |
| 17 | How many children have you ever born?                                |                                                                                                              |
| 18 | What is the distance between your house and nearest health facility? | a) less than 30 minutes<br>b) 30 minutes to 1 hour<br>c) 1-2 hours<br>d) more than 2 hours                   |
| 19 | What is the place for your child illness treatment?                  | a) Hospital (District, Zonal, Tertiary care )<br>b) Health Post<br>c) Dhami, jhakri<br>d) Others             |
| 20 | For how many months, Food is sufficient for your family members?     | a. <6 months<br>b. <12 months<br>c. >12 months                                                               |
| 21 | Household ownership of agriculture                                   | a) Yes<br>b) No                                                                                              |

### **Section 2 B. Behaviors Related Information**

| S.N | Question                                                                                                   | Response                                      |
|-----|------------------------------------------------------------------------------------------------------------|-----------------------------------------------|
| 2.1 | Do you currently smoke any tobacco products, such as cigarettes, cigars, pipes, bidis, hukahs or tamakhus? | a) Yes<br>b) No, if no go to another question |
| 2.2 | How old were you when you first started smoking?                                                           |                                               |
| 2.3 | Do you smoke any tobacco products currently?                                                               |                                               |

|     |                                                                                                                   |                                                                                                 |
|-----|-------------------------------------------------------------------------------------------------------------------|-------------------------------------------------------------------------------------------------|
| 2.4 | Have you ever consumed any alcoholic drink such as beer, wine, spirits, fermented cider or ( jaad, raksi, tungba? | a) Yes<br>b) If No, go to another question                                                      |
| 2.5 | How frequently have you had at least one alcoholic drink?                                                         |                                                                                                 |
| 2.6 | Have you consumed alcoholic drink within the past 7 days?                                                         | a) Yes<br>b) No if No go to another question                                                    |
| 2.7 | During the past 7 days, when you consumed alcoholic drink, how often was it with meals?                           | a) Usually with meals<br>b) Sometimes with meals<br>c) Rarely with meals<br>d) Never with meals |
| 2.8 | What is your food habit?                                                                                          | a)Vegetarian<br>b) Non vegetarian                                                               |

**Section 3 C: Child Feeding Practices**

| <b>3a. Timely introduction of complementary foods</b> |                                                                                      |                                                                                                 |
|-------------------------------------------------------|--------------------------------------------------------------------------------------|-------------------------------------------------------------------------------------------------|
| 3.1                                                   | Decision makers on child feeding                                                     | a) Husband<br>b) Wife<br>c) Both<br>d) Others                                                   |
| 3.2                                                   | Have you introduced any food apart from breast milk to your child?                   | a) Yes<br>No (if no move to other question.                                                     |
| 3.3                                                   | At what age did you introduce any others foods apart from breast milk to your child? | ..... Months                                                                                    |
| 3.4                                                   | Is your still child breast feeding?                                                  | a) Yes<br>b) No                                                                                 |
| 3.5                                                   | If no, why?                                                                          |                                                                                                 |
| 3.6                                                   | What was your reason for introducing food to your child?                             | a) Breast milk was no longer sufficient<br>b) Because child was 6 month old<br>c) other specify |
| 3.7                                                   | How long after birth did you first put to the breast?                                | A) Immediately<br>B) ..... Hours<br>C) .....Days                                                |

### **3b. Dietary Diversity**

From the meals mentioned, indicate if child receive any of these liquids and foods yesterday

| Food group |                                      | Example                                                                                                                             | Yes | No |
|------------|--------------------------------------|-------------------------------------------------------------------------------------------------------------------------------------|-----|----|
| 3.8        | Breast milk                          | Continuously breastfeed                                                                                                             |     |    |
| 3.9        | Eggs                                 | Eggs                                                                                                                                |     |    |
| 3.10       | Grains, roots                        | Noodles, Rice, Potatoes, Biscuits, Bread, Barley, Maize, Soya bean.                                                                 |     |    |
| 3.11       | Legumes and Nuts                     | Beans, Groundnuts, Okhar Grams, Bengal , Peas , Rajma                                                                               |     |    |
| 3.12       | Flesh foods                          | Chicken, Goat , Kidney liver , Fish ,Sheep                                                                                          |     |    |
| 3.13       | Dairy products                       | Milk , Yoghurt Ghee, Panir,                                                                                                         |     |    |
| 3.14       | Vitamin A rich Fruits and Vegetables | Carrot , Apple, Potato, Cucumber , Radish DGLV                                                                                      |     |    |
| 3.15       | Others Fruits and vegetables         | Any others fruit and vegetables (Tomato, Pumpkin, Green bean, Cabbage, Carrot, Cucumber, potato, Sweet potato, Spinach Cauliflower. |     |    |

### **3c. Minimum Meal Frequency**

|      |                                              |                                                |
|------|----------------------------------------------|------------------------------------------------|
| 3.16 | How many times do you feed your child a day? | a) 2 times<br>b) 3 times<br>c) 4 times or more |
|------|----------------------------------------------|------------------------------------------------|

### **4a. Nutrition allowance scheme information**

|     |                                                      |                                                           |
|-----|------------------------------------------------------|-----------------------------------------------------------|
| 4.1 | Have you receive nutrition allowance schemes?        | a) Yes<br>b) No                                           |
| 4.2 | Where do you get a nutrition allowance schemes?      | a) Ward office<br>b) Municipality<br>c) Bank<br>d) Others |
| 4.3 | How much incentive is received as Allowance schemes? | .....                                                     |

|      |                                                                                       |                                                                                                                                   |
|------|---------------------------------------------------------------------------------------|-----------------------------------------------------------------------------------------------------------------------------------|
| 4.4  | From where you have heard about nutrition allowance schemes?                          | a) Newspaper<br>b) T.V<br>c) Public Representative<br>d) Others                                                                   |
| 4.5  | Who goes to receive the incentive?                                                    | a) Self<br>b) Family other members                                                                                                |
| 4.6  | How convenient it was to receive incentive earlier?                                   | a) Convenient<br>b) Inconvenient                                                                                                  |
| 4.7  | If Inconvenient, then what are the difficulties you have to face?                     | c)                                                                                                                                |
| 4.8  | Was there any role of stakeholders to distribute the incentive receive by you?        | a) Yes<br>b) No                                                                                                                   |
| 4.9  | If yes then what are the support you get from stakeholder?                            |                                                                                                                                   |
| 4.10 | If No, then what are the difficulties you have to face to receive allowance?          |                                                                                                                                   |
| 4.11 | Have you being support by your family members to receive nutrition allowance schemes? | a) Yes<br>b) No                                                                                                                   |
| 4.12 | If yes then what are the support you get from your family members?                    |                                                                                                                                   |
| 4.13 | Have you engaged in professional /household works?                                    | a) Yes<br>b) No                                                                                                                   |
| 4.14 | If yes then how many hours do you engaged in those works?                             | a) 3 hours<br>b) 4 hours<br>c) 5 hours<br>d) 6-8 hours and more                                                                   |
| 4.15 | Being engaged in your own profession have you get time to receive incentive?          | a) Yes<br>b) No                                                                                                                   |
| 4.16 | Where do you spend the incentive?                                                     | c) Children Nutrition<br>d) Household activities<br>e) Children Clothes<br>a) Others ( Play group school, Recreation activities ) |
