# Supplementary material for: The factors influencing inappropriate child feeding practices among families receiving nutrition allowance in the Himalayan region of Nepal
Source: PubMed Central journal article supplement (PMC9940375; doi:10.1186/s40795-023-00691-3), 2023-02-20
Supplement: 40795_2023_691_MOESM3_ESM.pdf [file 40795_2023_691_MOESM3_ESM.pdf]

प्रश्नावली

फाराम नं. ....

मिति: ...../...../२०७७

अन्तर्वार्ता दिने व्यक्तिको नाम: .....

जिल्ला: .....

(महानगर/उपमहानगर/नगर/गाउँ)पालिका ..... वार्ड नं.: .....

**१. सामाजिक तथा जनसांख्यिक विवरण:**

| क्र.स. | प्रश्नावलि                                        | प्रतिक्रिया                                                                                                          |
|--------|---------------------------------------------------|----------------------------------------------------------------------------------------------------------------------|
| १      | लिङ्ग                                             | क) पुरुष<br>ख) महिला<br>ग) तेस्रो लिङ्गी                                                                             |
| २      | तपाइको उमेर कति हो ?                              |                                                                                                                      |
| ३      | तपाइले उत्तिर्ण गर्नु भएको उच्चतम शिक्षा कति हो ? | क) निरक्षर<br>ख) साक्षर<br>ग) आधारभूत<br>घ) मा.वि. तह<br>ङ) उच्चशिक्षा<br>१) स्नातक<br>२) स्नातकोत्तर<br>३) विशेषज्ञ |
| ४      | तपाइको जातिय परिवेश के हो ?                       | क) ब्राहमण<br>ख) ठकुरी/ क्षेत्री<br>ग) दलित<br>घ) जनजाती<br>ङ) अन्य                                                  |
| ५      | तपाई कुन् पेशा अपनाउनु भएको छ ?                   | क) व्यापार                                                                                                           |

|    |                                                                                                    |                                                                                                          |
|----|----------------------------------------------------------------------------------------------------|----------------------------------------------------------------------------------------------------------|
|    |                                                                                                    | ख) सेवा, नोकरी<br>ग) कृषि<br>घ) स्व-रोजगार<br>ङ) विद्यार्थी<br>च) उद्यमी<br>ज) बेरोजगार<br>झ) अन्य ..... |
| ६  | तपाईं को श्रीमान को पेसा के हो?                                                                    | .....                                                                                                    |
| ७  | तपाईंको परिवार मा कति जना सदस्य छन् ?                                                              | ..... जना                                                                                                |
| ८  | तपाईं कुन धर्म मान्नु हुन्छ ?                                                                      | क) हिन्दु<br>ख) बौद्ध<br>ग) इसाई<br>च) अन्य .....                                                        |
| ९  | तपाईंको आर्थिक स्रोत के हो ?                                                                       | क) व्यापार<br>ख) सेवा, नोकरी<br>ग) कृषि<br>घ) वैदेशिक रोजगारी<br>ङ) अन्य .....                           |
| १० | तपाईंको परिवारको मासिक आमदानी कति हो ?                                                             | .....                                                                                                    |
| ११ | तपाईं विवाह गर्दा कति वर्ष को हुनुहुन्थ्यो?                                                        | .....वर्ष                                                                                                |
| १२ | तपाईं को पहिलो सन्तान जन्माउदा कति वर्ष को हुनुहुन्थ्यो?                                           | .....वर्ष                                                                                                |
| १३ | तपाईं ले सन्तान जन्माएको स्थान कहाँ हो?                                                            | क) घर<br>ख) स्वास्थ्य संस्था                                                                             |
| १४ | तपाईं को अन्तिम सन्तान गर्व मा हुदा कति चोटी स्वास्थ्य संस्था चेक जाच गर्न को लागि जानुभयो?        | .....पटक                                                                                                 |
| १५ | तपाईं को अन्तिम सन्तानको जन्म भई सके पश्चात कति चोटी स्वास्थ्य संस्था चेकजाच गर्न को लागि जानुभयो? | .....पटक                                                                                                 |

|    |                                                              |                                                                                                     |
|----|--------------------------------------------------------------|-----------------------------------------------------------------------------------------------------|
| १६ | तपाईं को अन्तिम सन्तानको तौल कति थियो?                       | क) १.५ किलो भन्दा कम<br>ख) १.५ देखि २.५ किलो<br>ग) २.५ देखि ४ किलो सम्म<br>घ) ४ किलो भन्दा माथि     |
| १७ | तपाईं का जम्मा कति वटा सन्तान छन्?                           |                                                                                                     |
| १८ | तपाईं घर देखि स्वास्थ्य संस्था सम्म जान कति समय लाग्छ?       | क) ३० मिनेट भन्दा कम<br>ख) ३० मिनेट देखि १ घण्टा<br>ग) १ घण्टा देखि २ घण्टा<br>घ) २ घण्टा भन्दा बढि |
| १९ | बच्चाको रोग को उपचार गर्न कहाँ जानु हुन्छ?                   | क) अस्पताल( जिल्ला, अञ्चल, तिरतयक केन्द्र)<br>ख) स्वास्थ्यचौकि<br>ग) धामि, भ्नाकि<br>घ) अन्य        |
| २० | तपाईं को आम्दानीको श्रोत ले कति महिना सम्मको लागि खान पुग्छ? | क) ६ महिना<br>ख) १२ महिना<br>ग) १२ महिना भन्दा बढि                                                  |
| २१ | तपाईं को प्रमुख पेसा कृषि हो?                                | क) हो<br>ख) होइन                                                                                    |

### २ जीवनशैली सम्बन्धी जानकारी

| क्र.स. | प्रश्नावली                                                                                            | प्रतिक्रिया                                               |
|--------|-------------------------------------------------------------------------------------------------------|-----------------------------------------------------------|
| २.१    | हाल तपाईं कुनै प्रकारको सूतिजन्य पदार्थ जस्तै: चुरोट, सिगार, बिँडी, हुक्का वा तमाखु सेवन गर्नुहुन्छ ? | क) गर्छु<br>ख) गर्दैन (यदिगर्दैन भने प्र.नं.४ माजानुहोस्) |

|     |                                                                               |                                                                      |
|-----|-------------------------------------------------------------------------------|----------------------------------------------------------------------|
| २.२ | पहिलो पटक सूतिजन्यपदार्थ सेवन गर्दा कति उमेर को हुनुहुन्थ्यो ?                |                                                                      |
| २.३ | हाल तपाईले कुनै किसिमका सूतिजन्य पदार्थ सेवन गर्नुहुन्छ ?                     | क) गर्छु<br>ख) गर्दैन                                                |
| २.४ | तपाईले मद्यपान गर्नुभएको छ ?                                                  | क) गर्छु<br>ख) गर्दैन(यदि गर्दैन भने तेस्रो तहको प्रश्न मा जानुहोस्) |
| २.५ | तपाई कति समयको अन्तरालमा कम्तिमा एक प्रकारको मद्यपान गर्नुहुन्छ ?             |                                                                      |
| २.६ | तपाईले कुनै विगत ७ दिन भित्रमा मद्यपान गर्नुभएको छ ?                          | क) गरेको छु<br>ख) गरेको छैन                                          |
| २.७ | तपाईले कुनै विगत ७ दिन भित्र मद्यपान गर्दा कतिपटक खानासंगै मद्यपान गर्नुभयो ? | क) प्राय<br>ख) कहिलेकाहीं<br>ग) एकदमै कम<br>घ) कहिल्यै पनि लिन       |
| २.८ | तपाई को खानाको प्रकृति के हो?                                                 | क) साकाहारी<br>ख) माँसाहारी                                          |

### ३. बच्चाको आहार सम्बन्धि जानकारी

| १. पूरक खानाबारेमा |                                                  |                                         |
|--------------------|--------------------------------------------------|-----------------------------------------|
| ३.१                | पूरक खाना खुवाउनमा कस्ले निणय गर्दछ?             | क) बुवा<br>ख) आमा<br>ग) अरु             |
| ३.२                | तपाई ले आमाको दुध बाहेक अन्य खानाखुवाउनु भएको छ? | क) छ<br>ख) छैन - यदि छैन भने प्र.न १.४) |

|     |                                                     |                                                                                |
|-----|-----------------------------------------------------|--------------------------------------------------------------------------------|
| ३.३ | यदि छ भने कति उमेर हुदा देखि खुवाउन सुरु गर्नु भयो? | .....महिना                                                                     |
| ३.४ | तपाईं को बच्चा ले अझै आमाको दुध खान्छ?              | क) खान्छ<br>ख) खाँदैन                                                          |
| ३.५ | यदि खाँदैन भने किन खुवाउनु भएन?                     | .....                                                                          |
| ३.६ | तपाइले बच्चालाई पुरक खाना खुवाउनु को कारण के हो?    | क) आमाको दुध ले मात्रनपुग्ने भएर<br>ख)बच्चा ६ महिना पुरा भएकोले<br>ग) अन्यकारण |
| ३.७ | बच्चा जन्मेको कति समय मा आमाको दुध खुवाउनु भयो?     | क) तत्कालै<br>ख) ....घण्टा<br>ग).....दिन                                       |

## २. आहार बिबिधता

| खानाको समुह | उधारण                   | खाए                                           | खाएन |
|-------------|-------------------------|-----------------------------------------------|------|
| ३.८         | अण्डा                   | अण्डा                                         |      |
| ३.९         | अन्न, जरा               | चाउचाउ,जौ,मकै,सोयाबिन, भात, आलु, बिस्कुट,रोटी |      |
| ३.१०        | फलिया, बदाम             | सिमि,ओखर,बदाम, गन्म, मटर, राजमा               |      |
| ३.११        | मासु खाना               | माछा, कलेजो खसी, बोकाला                       |      |
| ३.१२        | दुधका प्रकार            | दहि, घिउ,दुध, पनिरा                           |      |
| ३.१३        | फलफुल र तरकारि काप्रकार | स्याउ,गाजर, मुला, काका                        |      |
| ३.१४        | अरु फलफुल र सागपात      | बोडी, बन्दा, मिठो आलु, पालङ्गो, काउली         |      |

### ३. न्यूनतम् खानाआवृत्ति

|      |                                                |                                              |
|------|------------------------------------------------|----------------------------------------------|
| ३.१५ | दिनमा कति पटक बच्चालाई पुरक खानाखुवाउनु हुन्छ? | क) २ पटक<br>ख) ३ पटक<br>ग) ४ वा सो भन्दा बढि |
|------|------------------------------------------------|----------------------------------------------|

### ४. पोषणभत्ता सम्बन्धित प्रश्नावलि

| क्र.सं. | प्रश्नहरु                                                     | प्रतिक्रिया                                                              |
|---------|---------------------------------------------------------------|--------------------------------------------------------------------------|
| ४.१     | तपाईं ले पोषण भत्तापाउनु हुन्छ?                               | क) पाउछु<br>ख) पाउदैन                                                    |
| ४.२     | तपाईं ले पोषण भत्ताकहाँ बाट प्राप्तगर्नु हुन्छ?               | क)वडा कार्यालय बाट<br>ख) गा.पा / नगरपालिका बाट<br>ग)बैंक<br>घ) अन्य..... |
| ४.३     | तपाईंले पोषण भत्ता वाफत पाउने रकम कति हो?                     |                                                                          |
| ४.४     | तपाईंले पोषण भत्ता कार्यक्रम बारे कहाँ बाट जानकारी पाउनु भयो? | क) पत्रपत्रिका<br>ख) टि.भि<br>ग) जनप्रतिनिधि<br>घ) गा.पा                 |

|      |                                                                                                                                  |                                                                           |
|------|----------------------------------------------------------------------------------------------------------------------------------|---------------------------------------------------------------------------|
| ४.५  | उक्तपोषण भत्ता प्राप्त गर्न को जानुहुन्छ ?                                                                                       | क) आफै<br>ख) घर को अरु सदस्य                                              |
| ४.६  | सुरुवाती दिनहरु मा उक्त सेवा लिन तपाइलाई कतिको सहजभयो?                                                                           | क ) सहजभयो<br>ख) सहजभयन                                                   |
| ४.७  | यदि सहज भएन भने कस्तो किसिमको कठिनाइ भोग्नु भयो?                                                                                 | .....                                                                     |
| ४.८  | उक्त सेवादिन र लिनमा समाजका अरु व्यक्तिहरु (जनप्रतिनिधि, सामाजिक अभियान्ता, सरकारि तथा गैरसरकारि संस्था) को भुमिका थियो कि थिएन? | क) थियो<br>ख ) थिएन                                                       |
| ४.९  | यदि भुमिका थियो भने कस्तो किसिमको थियो?                                                                                          | .....                                                                     |
| ४.१० | यदि भुमिका थिएन भने कस्तो किसिमको समस्याहरु भोग्नु भयो?                                                                          | .....                                                                     |
| ४.११ | पोषण भत्ता प्राप्त गर्नु मा तपाईलाई तपाई को परिवार वाट सहयोग पाई राख्नु को छ ?                                                   | क) छ<br>ख) छैन                                                            |
| ४.१२ | यदि सहयोग पाई राख्नु भएको छ भने कस्ता किसिमका सहयोग पाउनु भएको छ ?                                                               | .....                                                                     |
| ४.१३ | तपाई आफै कुनै पेसा (जागिर अथवा अरु घरायसी काम) सँग आवद्धित हुनुहुन्छ ?                                                           | क) छु<br>ख ) छैन                                                          |
| ४.१४ | हुनुहुन्छ भने दिनमा कति घण्टा जति काम गर्नु हुन्छ?                                                                               | .....घण्टा                                                                |
| ४.१५ | तपाई आफै पेसा सँग आवद्धित भएर पोषण भत्ता प्राप्त गर्नमा समय पुगेको छ?                                                            | क) छ<br>ख) छैन                                                            |
| ४.१६ | तपाईले प्राप्त गर्नु भएको पैसा कुन कुन प्रयोजनमा प्रयोग गर्नु हुन्छ?                                                             | क) बच्चाको पोषणमा<br>ख) घरायसी काममा<br>ग) बच्चाको लुगा कपडामा<br>घ) अन्य |
